# Supplementary material for: Co-amorphous palbociclib–organic acid systems with increased dissolution rate, enhanced physical stability and equivalent biosafety
Source: Royal Society of Chemistry journal article supplement (doi:10.1039/c8ra09710k), 2019-01-01
Supplement: c8ra09710k1.pdf [file c8ra09710k1.pdf]

## Supplementary Material

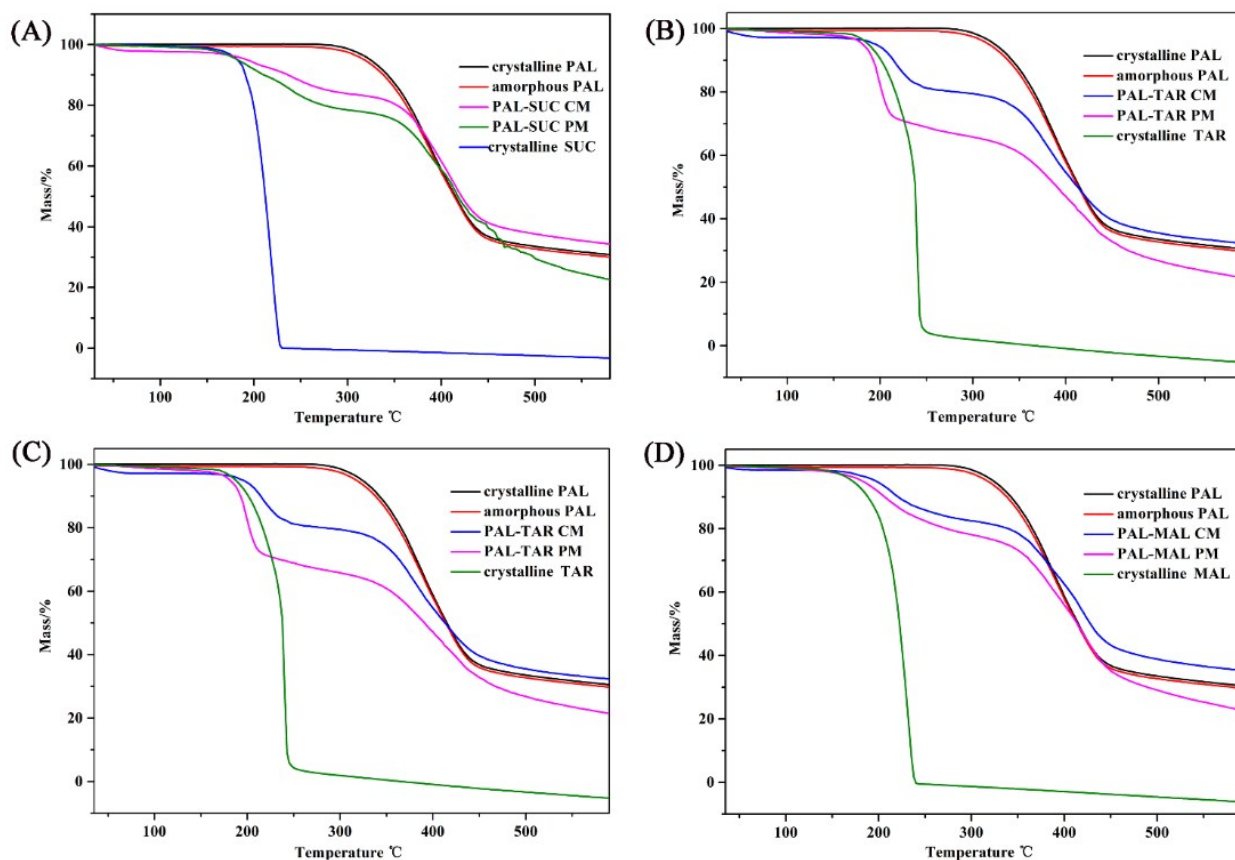

**Figure S1.** TGA curves of (A) PAL-SUC, (B) PAL-TAR, (C) PAL-CIT, and (D) PAL-MAL.

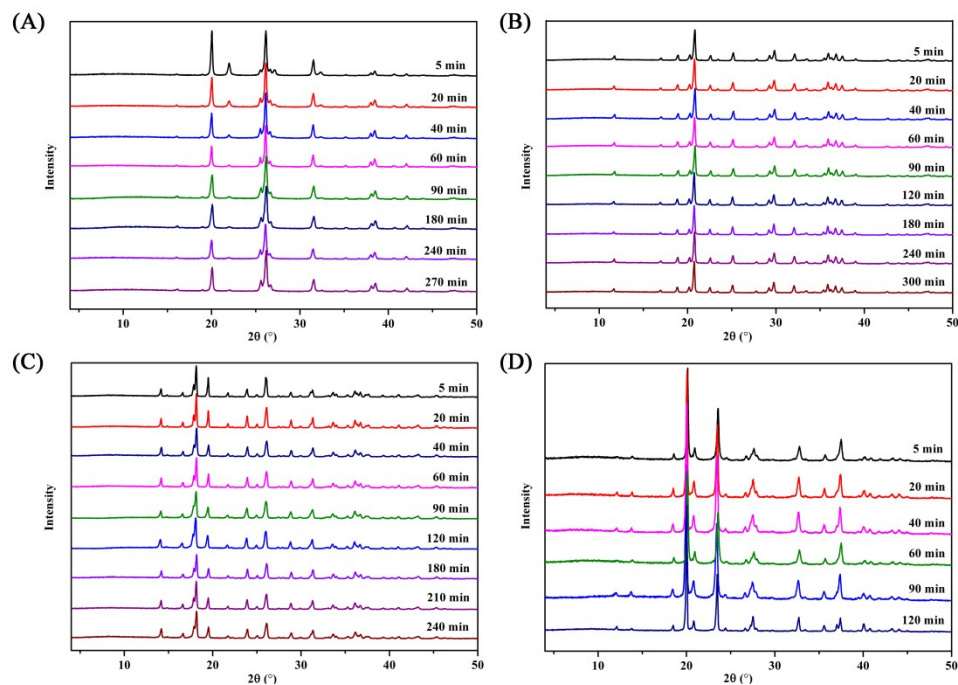

**Figure.S2.** X-ray powder diffraction patterns at selected time intervals. (A) PAL, (B) PAL-SUC CM, (C) PAL-TAR CM, (D) PAL-CIT CM, and (E) PAL-MAL CM

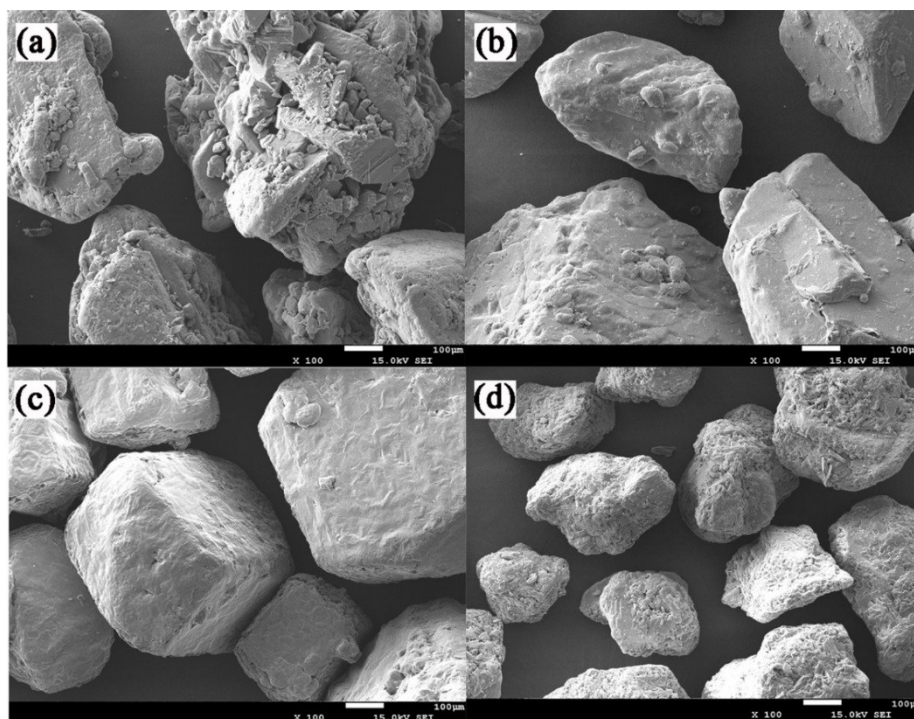

**Figure S3.** SEM images of four organic acids: (a) SUC, (b) TAR, (c) CIT, and (d) MAL. The images were magnified by 100×.

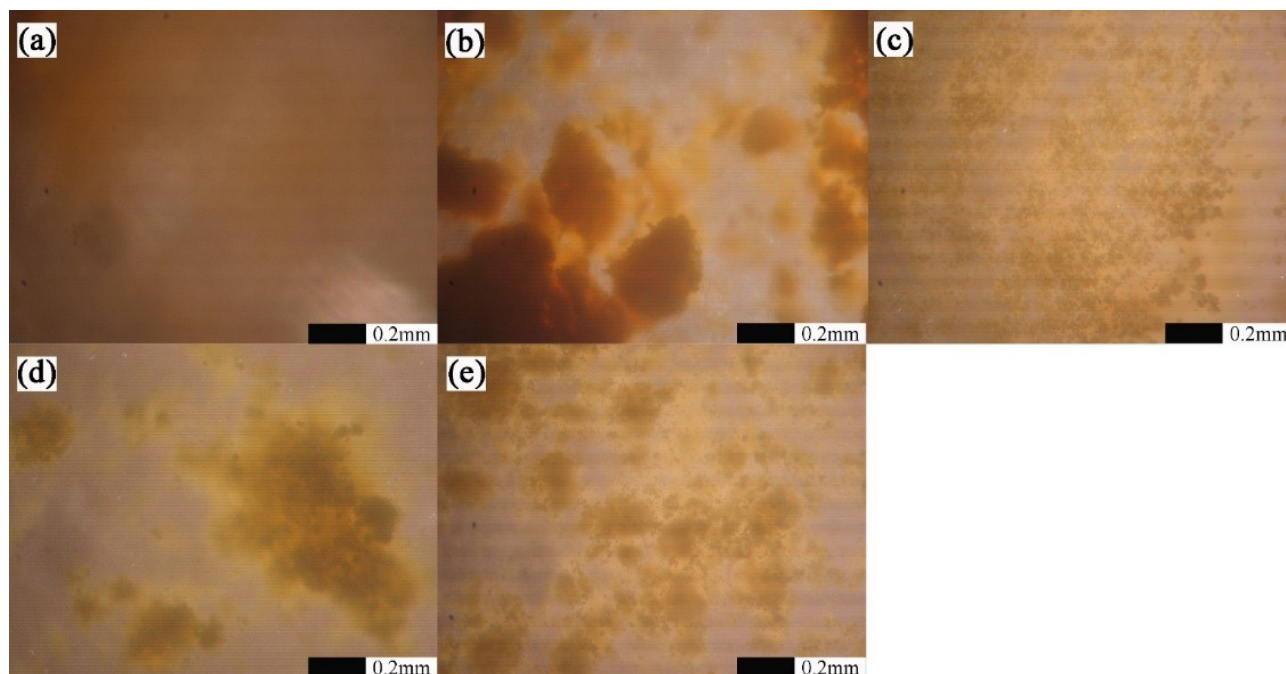

**Figure S4.** HSM image of solid powder sample at 40 °C. (a) Amorphous PAL, (b) PAL-SUC CM, (c) PAL-TAR CM, (d) PAL-CIT CM, and (e) PAL-MAL CM.

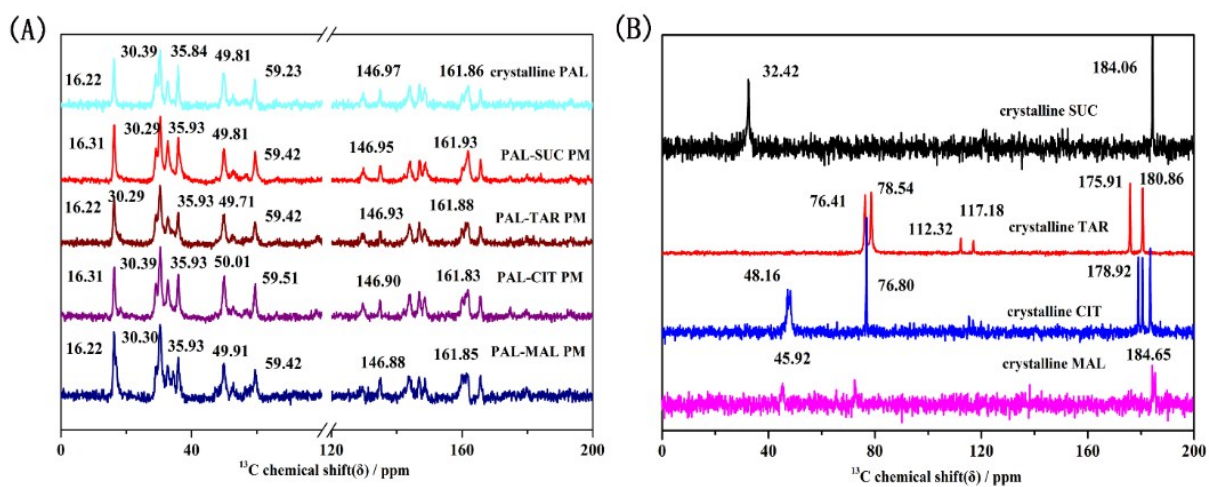

**Figure S5.** Solid-state  $^{13}\text{C}$  NMR spectra of (A) crystalline PAL and crystalline PAL-Acid physical mixture (PM); (B) four organic acids

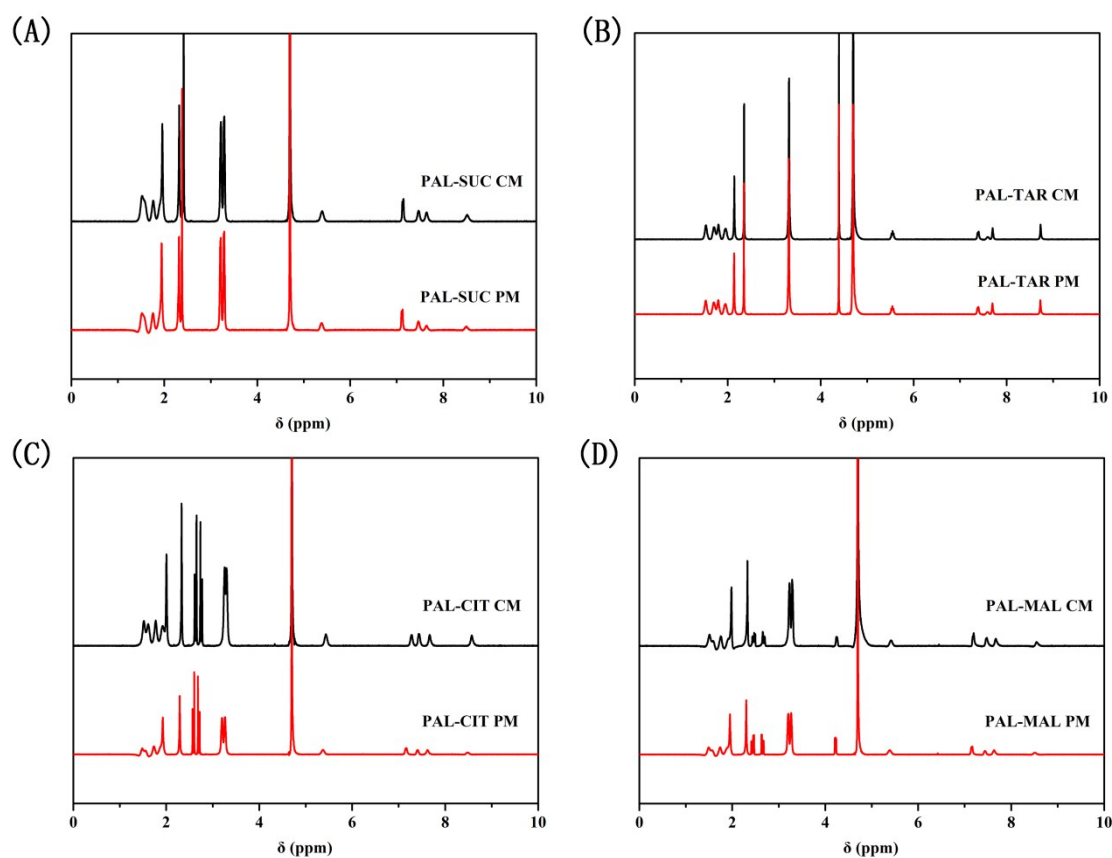

**Figure S6.**  $^1\text{H}$  NMR spectra of (A) PAL-SUC, (B) PAL-TAR, (C) PAL-CIT, and (D) PAL-MAL.

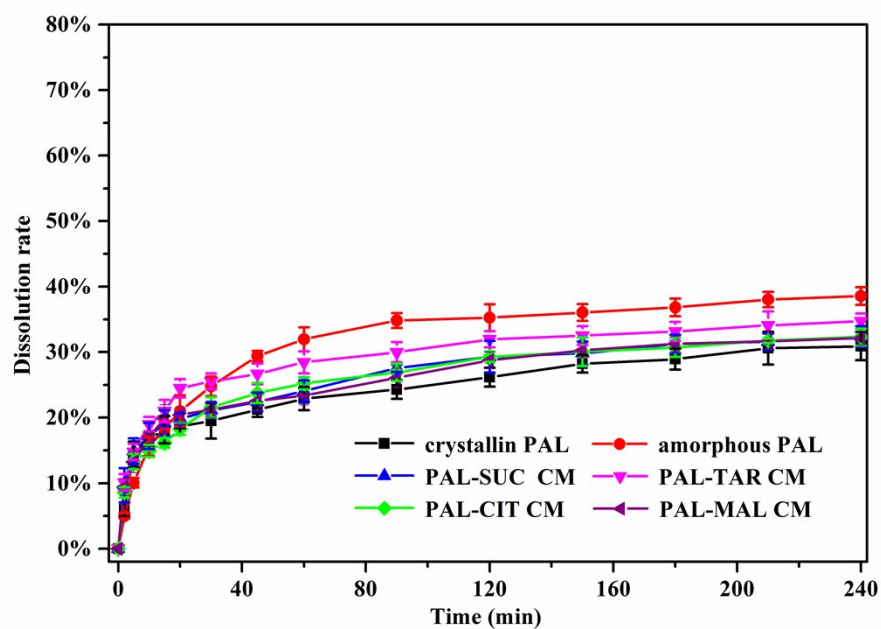

**Figure S7.** Dissolution rate curves of crystalline PAL, amorphous PAL, and PAL-acid PM.



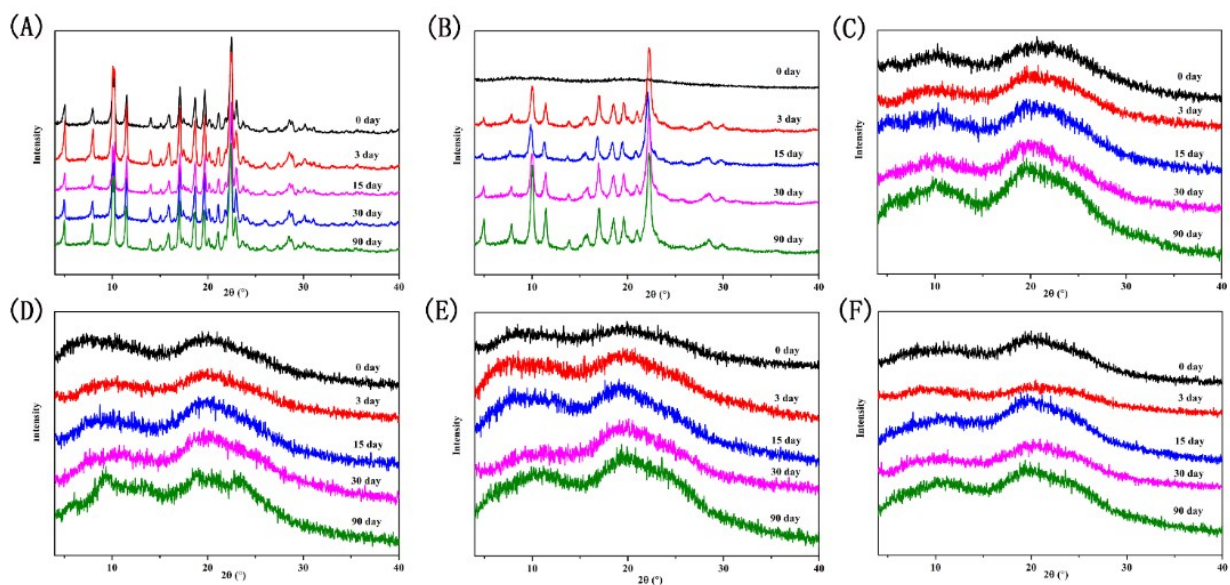

**Figure S8.** Stored at 40 °C/RH 57% over a specified period.

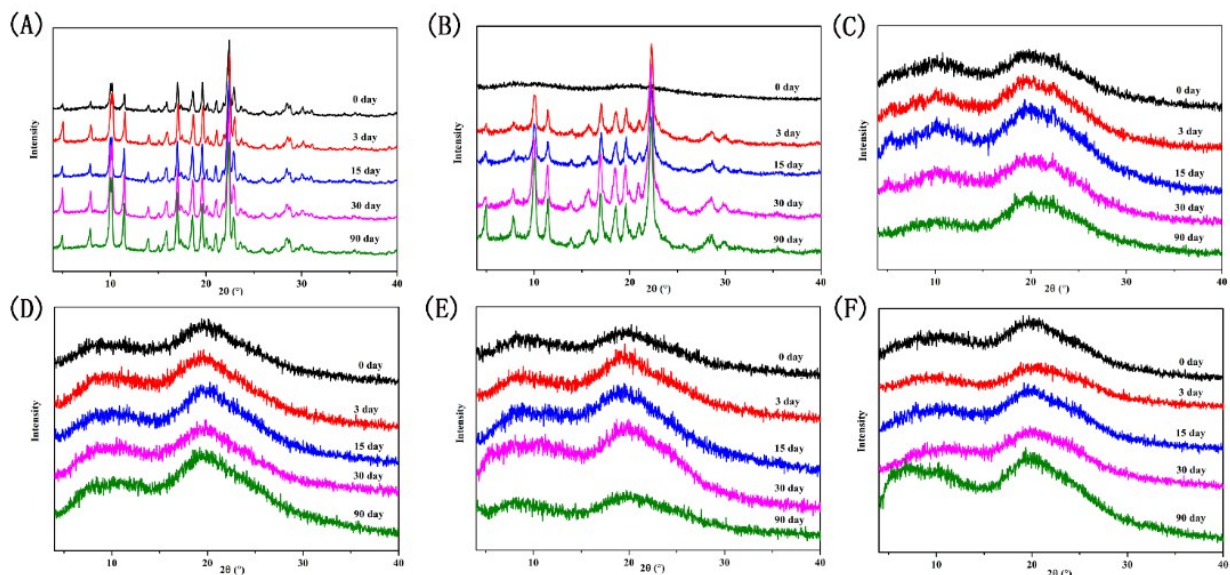

**Figure S9.** Stored at 40 °C/RH 32% over a specified period.

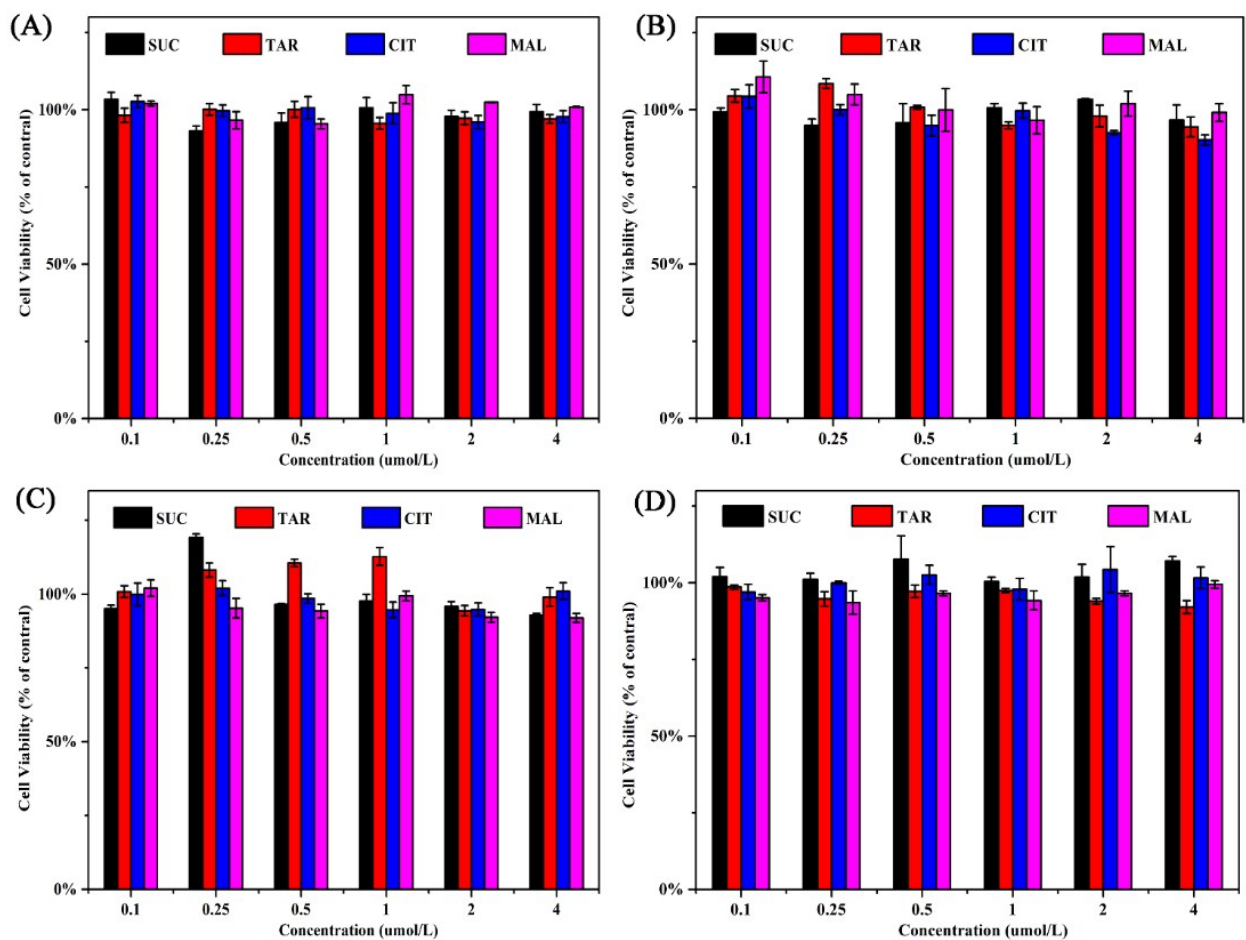

**Figure S10.** Inhibition of the proliferation of (A) MDA-MB-453, (B) MCF-7, (C) MCF-10A, and (D) 293T treated with SUC, TAR, CIT, and MAL.
